# Supplementary material for: Quantitative Metabolomics of Tissue, Perfusate, and Bile from Rat Livers Subjected to Normothermic Machine Perfusion
Source: MDPI journal article supplement (doi:10.3390/biomedicines10030538), 2022-02-24

# Supplementary Material

## **NMR spectroscopy-based metabolomic profile of tissue, perfusate, and bile from rat livers subjected to normothermic machine perfusion**

Caterina Lonati, Daniele Dondossola, Laimdota Zizmare, Michele Battistin, Leonie Wüst, Luigi Vivona, Margherita Carbonaro, Alberto Zanella, Stefano Gatti, Andrea Schlegel and Christoph Trautwein

|                                                                                                                                        |           |
|----------------------------------------------------------------------------------------------------------------------------------------|-----------|
| <b><i>Supplementary material and methods</i></b> .....                                                                                 | <b>2</b>  |
| <b>Supplementary Figure 2. Schematic representation of the ex-situ normothermic machine perfusion system</b> .....                     | <b>3</b>  |
| <b>Supplementary Table 1. Perfusion fluid composition</b> .....                                                                        | <b>4</b>  |
| <b><i>Supplementary results</i></b> .....                                                                                              | <b>5</b>  |
| <b>Supplementary Table 2. Baseline perfusate composition</b> .....                                                                     | <b>5</b>  |
| <b>Supplementary Figure 3. Oxygen delivery/consumption during NMP</b> .....                                                            | <b>6</b>  |
| <b>Supplementary Figure 4. Heatmap representing the metabolite concentrations in liver tissue homogenates</b> .....                    | <b>8</b>  |
| <b>Supplementary Figure 5. Heatmap representing the metabolite concentrations in the perfusate samples</b> .....                       | <b>9</b>  |
| <b>Supplementary Figure 6. Heatmap representing the metabolite concentrations in bile samples</b> .....                                | <b>10</b> |
| <b>Supplementary Figure 7. Averaged heatmaps representing differentially expressed and statistically significant metabolites</b> ..... | <b>11</b> |

**Supplementary material and methods**

**Supplementary Figure S1.** Schematic representation of the experimental workflow.

All groups received a surgery, further SCS, h-NMP and OxC-NMP had in-situ perfusion and SCS for 30 minutes. Finally, h-NMP and OxC-NMP groups as the name suggests had the NMP.

|         | Surgery | In-situ flushing | SCS (30 min) | NMP |
|---------|---------|------------------|--------------|-----|
| Native  |         |                  |              |     |
| SCS     |         |                  |              |     |
| h-NMP   |         |                  |              |     |
| OxC-NMP |         |                  |              |     |

**Supplementary Figure S2.** Schematic representation of the ex-situ normothermic machine perfusion system.

The system was derived from an isolated lung perfusion system (Hugo Sachs Elektronik, Harvard Apparatus, March-Hugstetten, Germany) with disposable PVC tubes and membrane oxygenator (Micro-1 rat oxygenator, Kewei Rising Medical, Shenzhen, China). The perfusate flow was generated by a peristaltic pump and the membrane oxygenator received a gas mixture of 95% oxygen and 5% carbon dioxide (CO<sub>2</sub>). The liver, connected to the circuit using the portal vein cannula, was placed on a double layer of Parafilm® (Merck, KGaA, Darmstadt, Germany), previously modelled and perforated to allow the drainage of the perfusate to the reservoir. Recirculating water bath was set to maintain graft temperature at 37°C that was measured with a custom-made thermocouple. Pressures along the circuit were monitored downstream the peristaltic pump and upstream the portal cannula.

A: Water Jacked reservoir, B: Peristaltic Pump, C: Membrane oxygenator, D: Heating Coil/bubble trap.

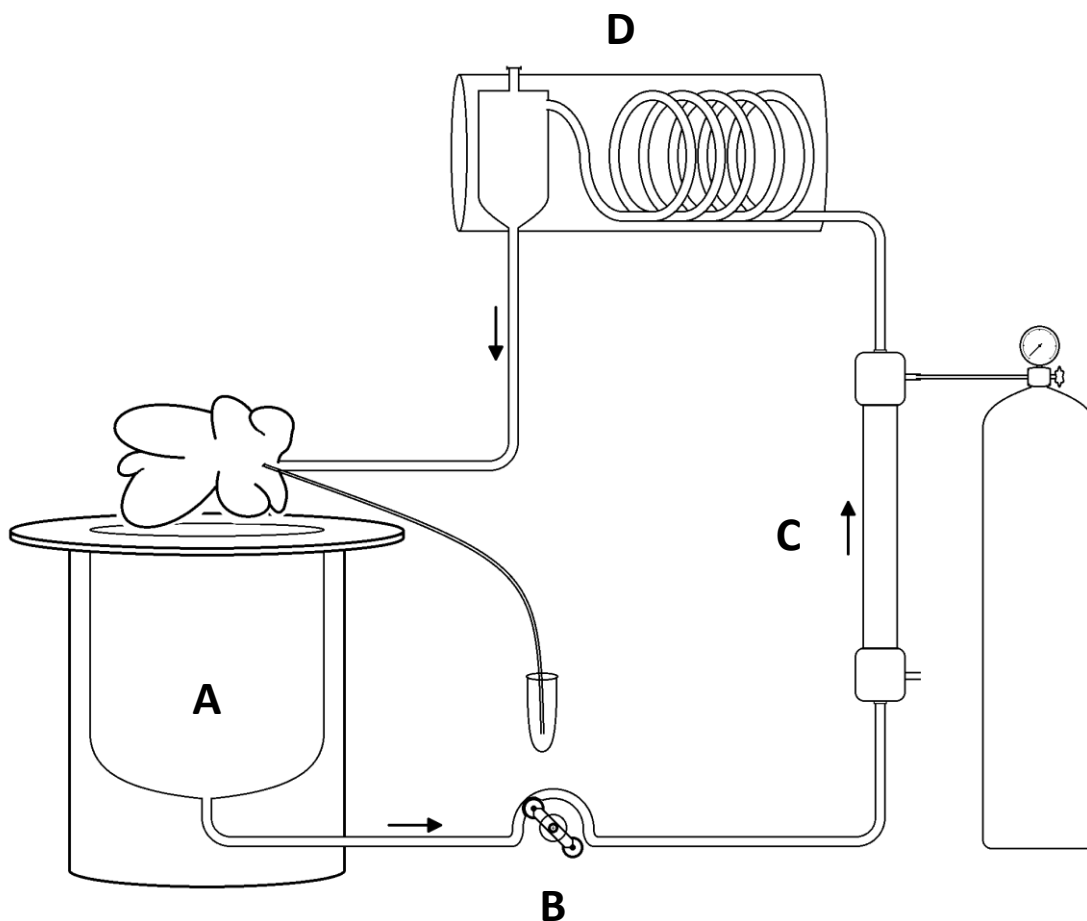

**Supplementary Table S1.** Perfusion fluid composition

|                                          | <b>h-NMP</b> |                      | <b>OxC-NMP</b> |                      |
|------------------------------------------|--------------|----------------------|----------------|----------------------|
|                                          | <b>mL</b>    | <b>Concentration</b> | <b>mL</b>      | <b>Concentration</b> |
| <b>DMEM</b>                              | 76           |                      | 37.5           |                      |
| <b>Oxyglobin® (13 g/dL hemoglobin)</b>   | 0            | 0                    | 38.5           | 5 g/dL               |
| <b>Human Albumin (20 %)</b>              | 20           | 4%                   | 20             | 4%                   |
| <b>Pen-Strep (10000 U/mL – 10 mg/mL)</b> | 1            | 100 U/mL – 0.1 mg/mL | 1              | 100 U/mL – 0.1 mg/mL |
| <b>L-Glutamine (200 mM)</b>              | 1            | 0.292 g/L            | 1              | 0.292 g/L            |
| <b>Human Insulin (100 UI/mL)</b>         | 2            | 2 U/mL               | 2              | 2 U/mL               |
| <b>Total Volume</b>                      | 100          |                      | 100            |                      |

## Supplementary results

**Supplementary Table S2.** Baseline perfusate composition

|                                            | <b>h-NMP (n=5)</b> | <b>OxC-NMP (n=5)</b> | <b>P value</b> |
|--------------------------------------------|--------------------|----------------------|----------------|
| <b>pH</b>                                  | 7.38 ± 0.09        | 7.16 ± 0.27          | 0.118          |
| <b>Hb, g/dL</b>                            | -                  | 5.2 ± 0.2            | -              |
| <b>Htc, %</b>                              | -                  | 16 ± 1               | -              |
| <b>Gluc, g/dL</b>                          | 80.00 ± 0.50       | 39.00 ± 1.00         | <0.001         |
| <b>Lac, mmol/L</b>                         | -                  | 4.2 ± 0.2            | -              |
| <b>K<sup>+</sup>, mmol/L</b>               | 4.1 ± 0.1          | 3.6 ± 0.1            | <0.001         |
| <b>Na<sup>+</sup>, mmol/L</b>              | 149 ± 1            | 148 ± 2              | 0.166          |
| <b>Ca<sup>2+</sup>, mmol/L</b>             | 0.72 ± 0.28        | 0.85 ± 0.10          | 0.429          |
| <b>Cl<sup>-</sup>, mmol/L</b>              | 121 ± 2            | 113 ± 1              | <0.001         |
| <b>HCO<sub>3</sub><sup>-</sup>, mmol/L</b> | 23 ± 2             | 13 ± 1               | <0.001         |

**Supplementary Figure S3.** Oxygen delivery/consumption during NMP.

Two-way repeated measures ANOVA; Tukey’s post hoc test. DO<sub>2</sub>: p<0.001; VO<sub>2</sub>: p<0.05 at 5 min.

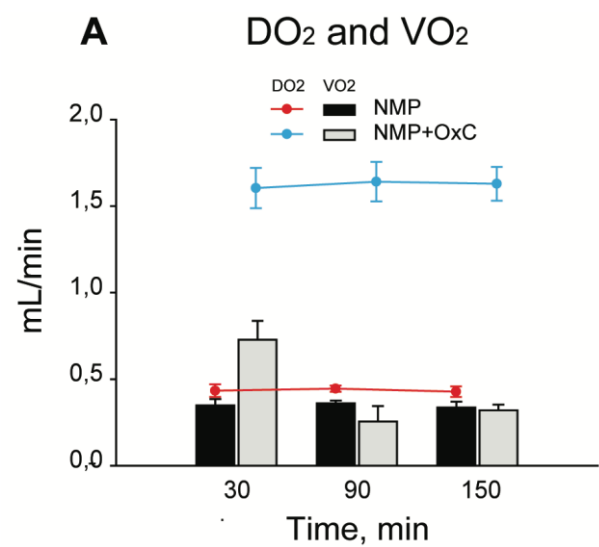



**Supplementary Figure S4.** Heatmap representing the metabolite concentrations in liver tissue homogenates.

Abbreviations: SCS – static cold storage, NMP – normothermic machine perfusion, h-NMP – hypoxic NMP, OxC-NMP – oxygen carrier NMP, UMP – uracil monophosphate, IMP – inosine monophosphate, GSSG – glutathione disulfide, UDP – uracil diphosphate.

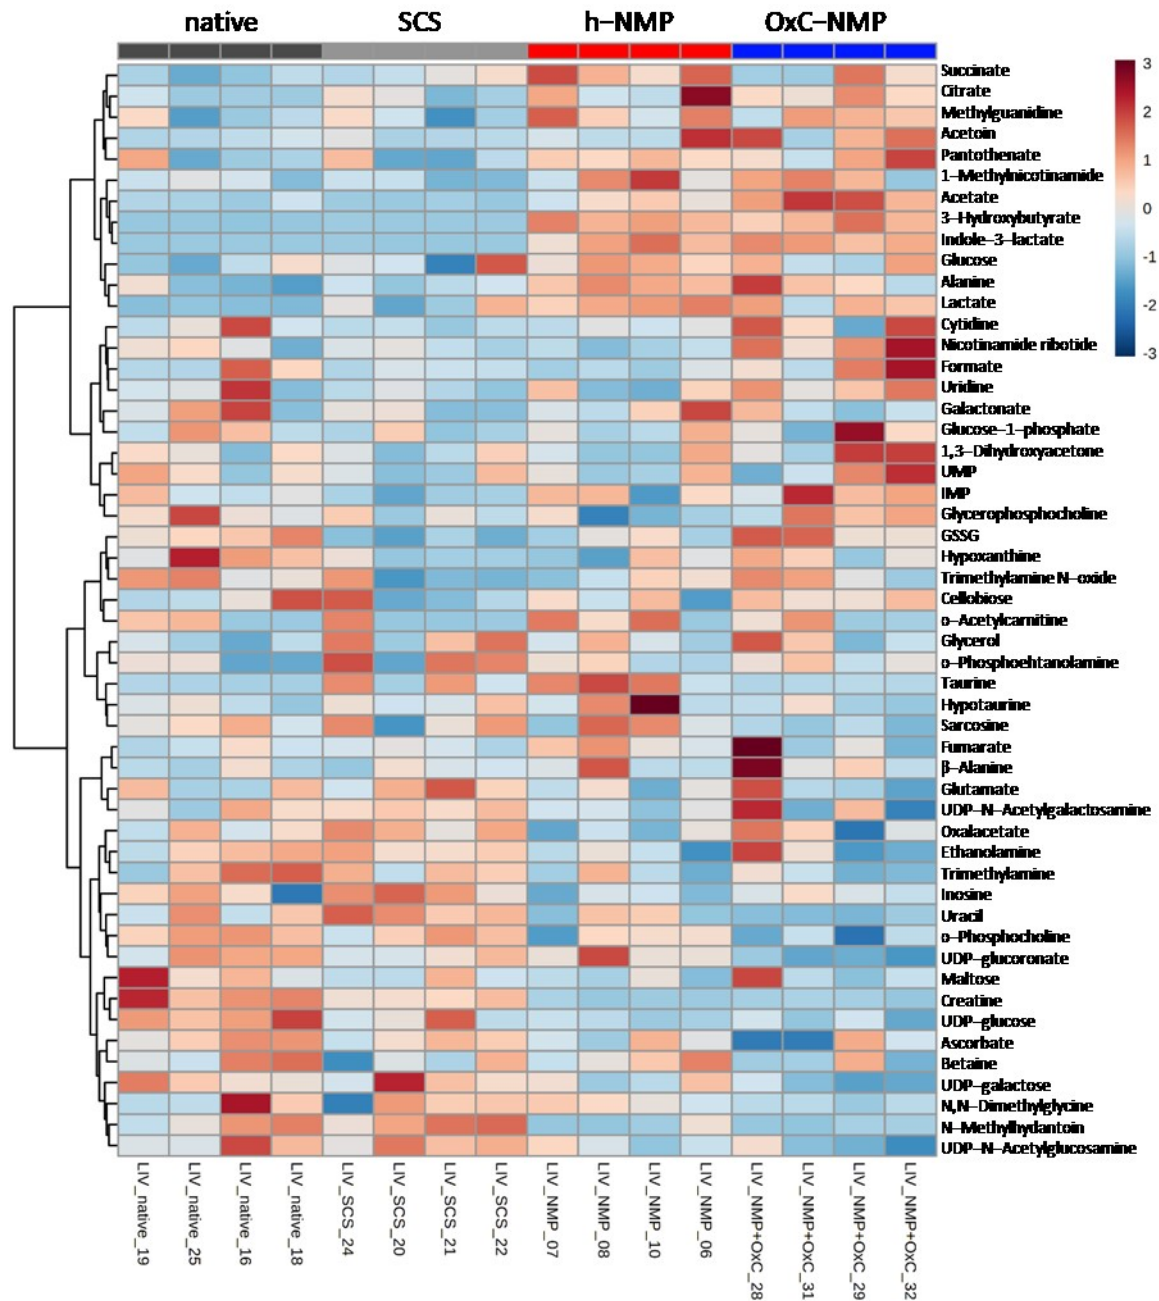



**Supplementary Figure S5.** Heatmap representing the metabolite concentrations in the perfusate samples.

Abbreviations: SCS – static cold storage, NMP – normothermic machine perfusion, h-NMP – hypoxic NMP, OxC-NMP – oxygen carrier NMP.

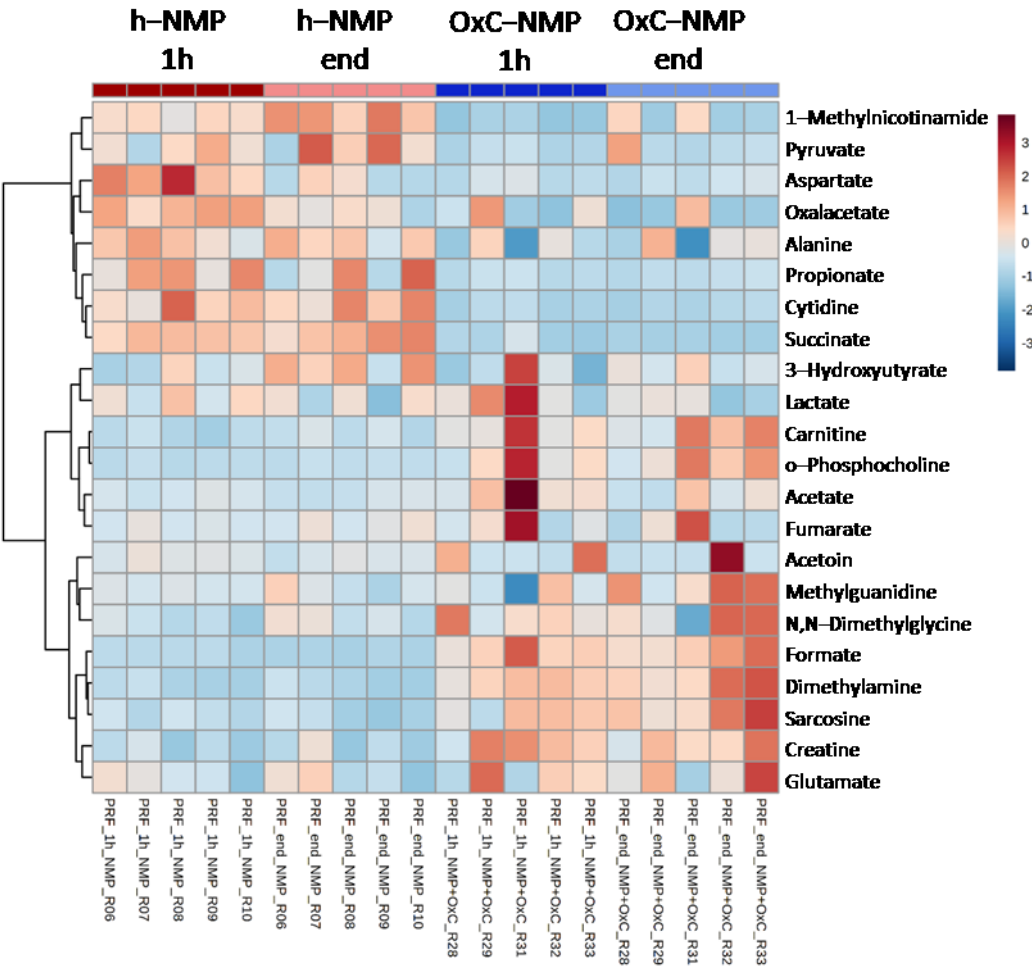

**Supplementary Figure S6.** Heatmap representing the metabolite concentrations in bile samples. Abbreviations: SCS – static cold storage, NMP – normothermic machine perfusion, h-NMP – hypoxic NMP, OxC-NMP – oxygen carrier NMP, c – carbon, GSSG – glutathione disulfide.

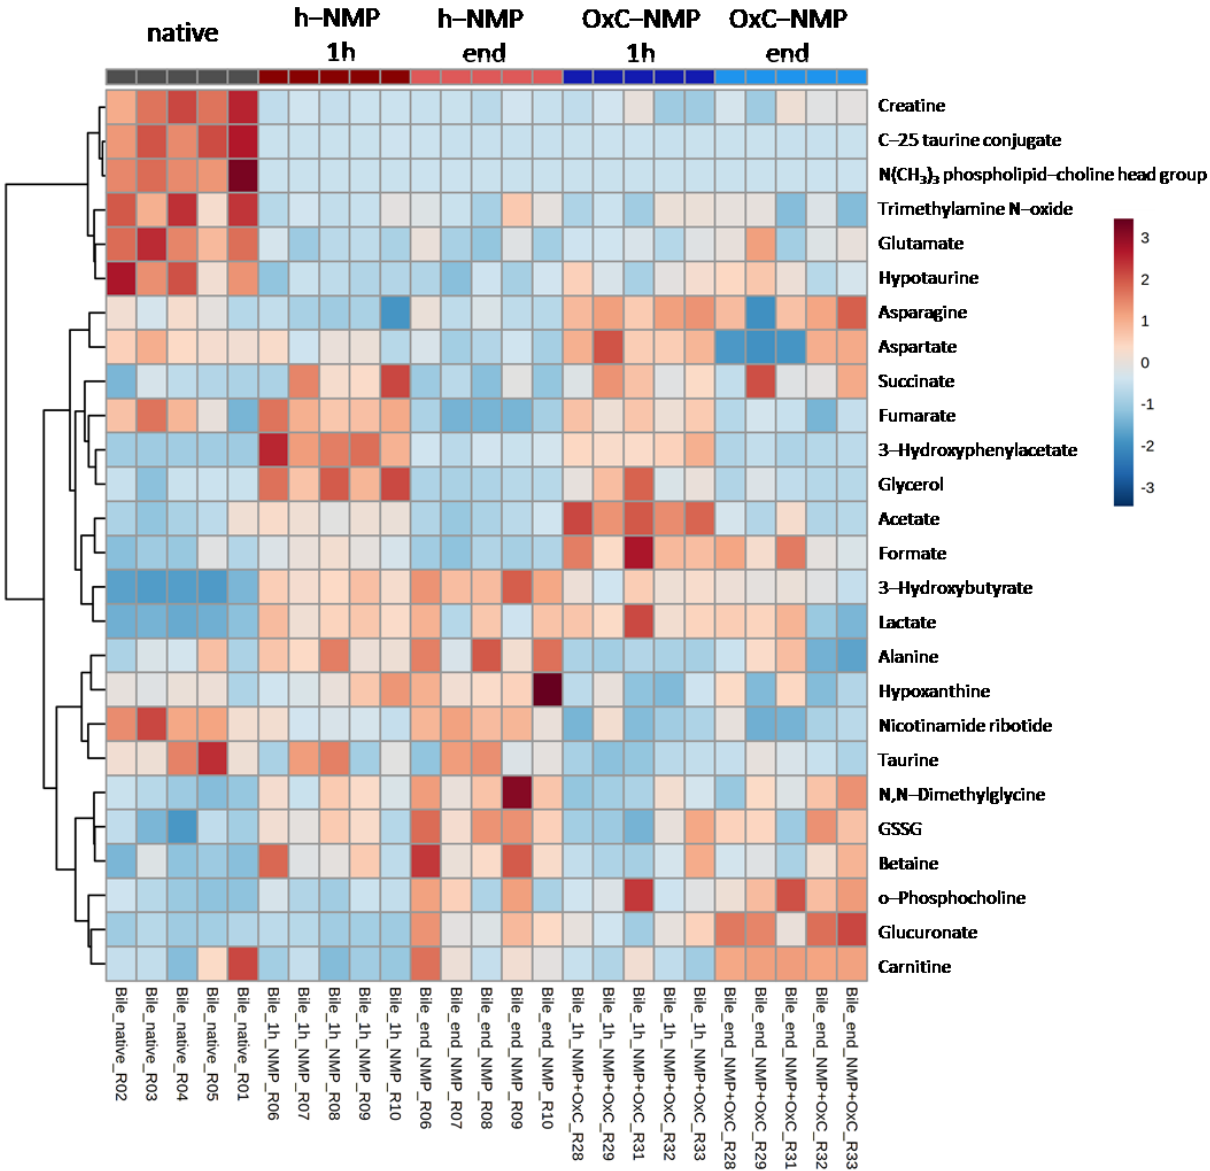

**Supplementary Figure S7.** Averaged heatmaps representing differentially expressed and statistically significant metabolites.

(a) liver biopsies; (b) perfusate samples. One-way ANOVA,  $p < 0.05$ .

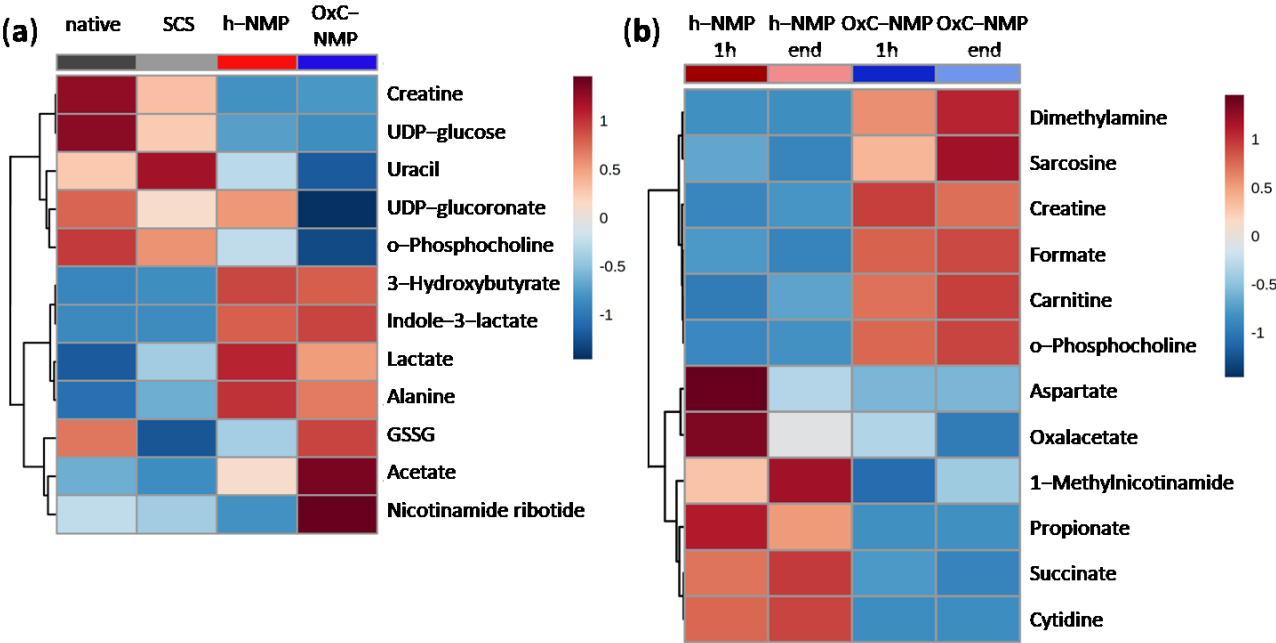

Supplement: s1 [file s1]
